# Supplementary material for: Evaluation of the absorption Ångström exponents for traffic andwood burning in the Aethalometer based source apportionmentusing radiocarbon measurements of ambient aerosol
Source: Copernicus journal article supplement (doi:10.5194/acp-2016-621), 2016-08-15
Supplement: Supplementary file 1 [file acp-2016-621-supplement.pdf]

# **Supplementary materials for Evaluation of the absorption Ångström exponents for traffic and wood burning in the Aethalometer based source apportionment using radiocarbon measurements of ambient aerosol**

P. Zotter<sup>1,#</sup>, H. Herich<sup>2</sup>, M. Gysel<sup>1</sup>, I. El-Haddad<sup>1</sup>, Y.L. Zhang<sup>1,3,4,5,†</sup>, G. Močnik<sup>6,7</sup>, C. Hüglin<sup>2</sup>, U. Baltensperger<sup>1</sup>, S. Szidat<sup>3,4</sup>, A.S.H. Prévôt<sup>1</sup>

<sup>1</sup>Laboratory of Atmospheric Chemistry, Paul Scherrer Institute (PSI), 5232 Villigen PSI, Switzerland

<sup>2</sup>Laboratory for Air Pollution and Environmental Technology, Swiss Federal Laboratories for Materials Science and Technology (Empa), Überlandstrasse 129, 8600 Dübendorf, Switzerland

<sup>3</sup>Department of Chemistry and Biochemistry, University of Bern, Bern, Switzerland

<sup>4</sup>Oeschger Centre for Climate Change Research, University of Bern, Bern, Switzerland

<sup>5</sup>Laboratory of Radiochemistry and Environmental Chemistry, Paul Scherrer Institute (PSI), 5232 Villigen PSI, Switzerland

<sup>6</sup>Aerosol d.o.o., Research and Development Department., Ljubljana, Slovenia

<sup>7</sup>Condensed Matter Physics Department, Jožef Stefan Institute, Ljubljana, Slovenia

<sup>#</sup>now at: Lucerne University of Applied Sciences and Arts, School of Engineering and Architecture, Bioenergy Research, Technikumstrasse 21, CH-6048 Horw, Switzerland

<sup>†</sup>now at: Yale-NUIST Center on Atmospheric Environment, Nanjing University of Information Science and Technology, 210044, Nanjing, China

*Correspondence to:* A.S.H. Prévôt (andre.prevot@psi.ch)

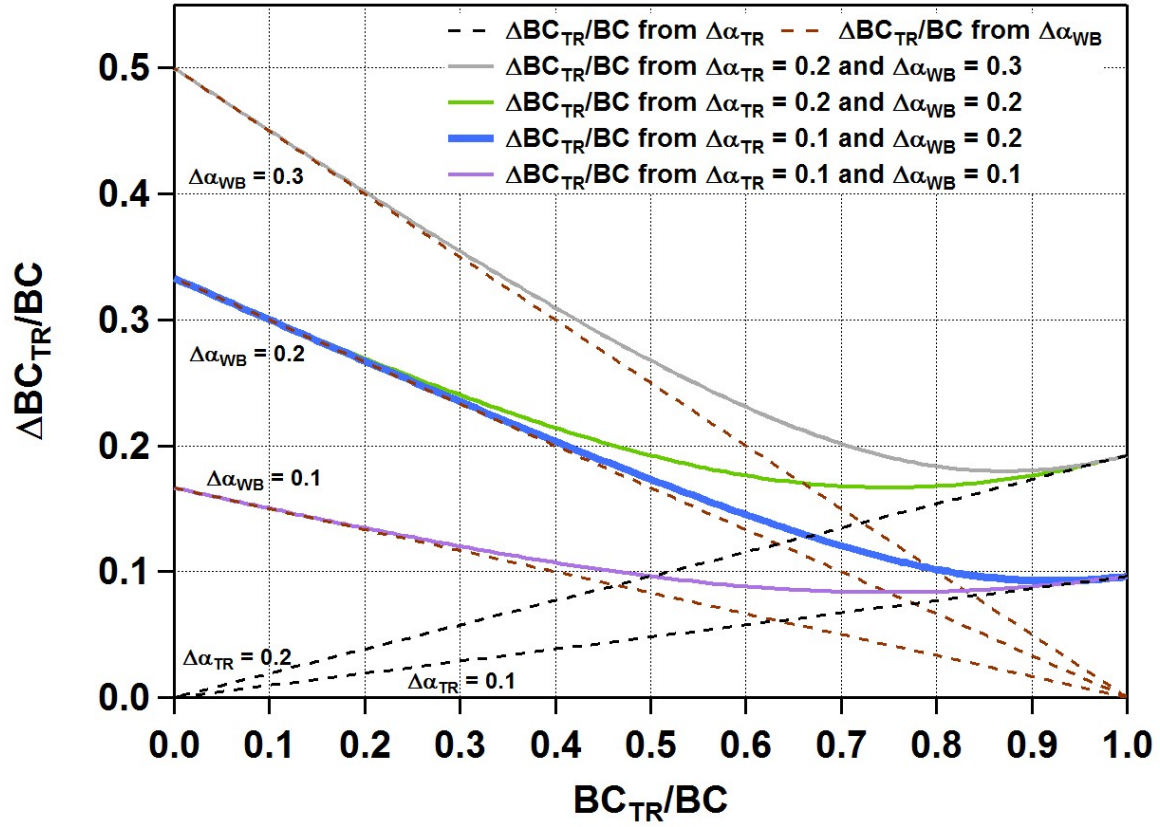

Figure S1: Residuals of  $BC_{TR}/BC$  compared to  $EC_F/EC$  ( $\Delta BC_{TR}/BC$ ) as a function of  $BC_{TR}/BC$  calculated with  $\alpha_{TR} = 0.90$  and  $\alpha_{WB} = 1.68$  and using the wavelength pair 470 nm and 950 nm. The brown and black dashes lines denote the residuals of  $BC_{TR}/BC$  with respect to an error of  $\alpha_{WB}$  and  $\alpha_{TR}$  ( $\Delta \alpha_{WB}$  and  $\Delta \alpha_{TR}$ ), respectively, and the solid coloured lines represent the errors in  $BC_{TR}/BC$  with respect to errors in both,  $\alpha_{WB}$  and  $\alpha_{TR}$ .

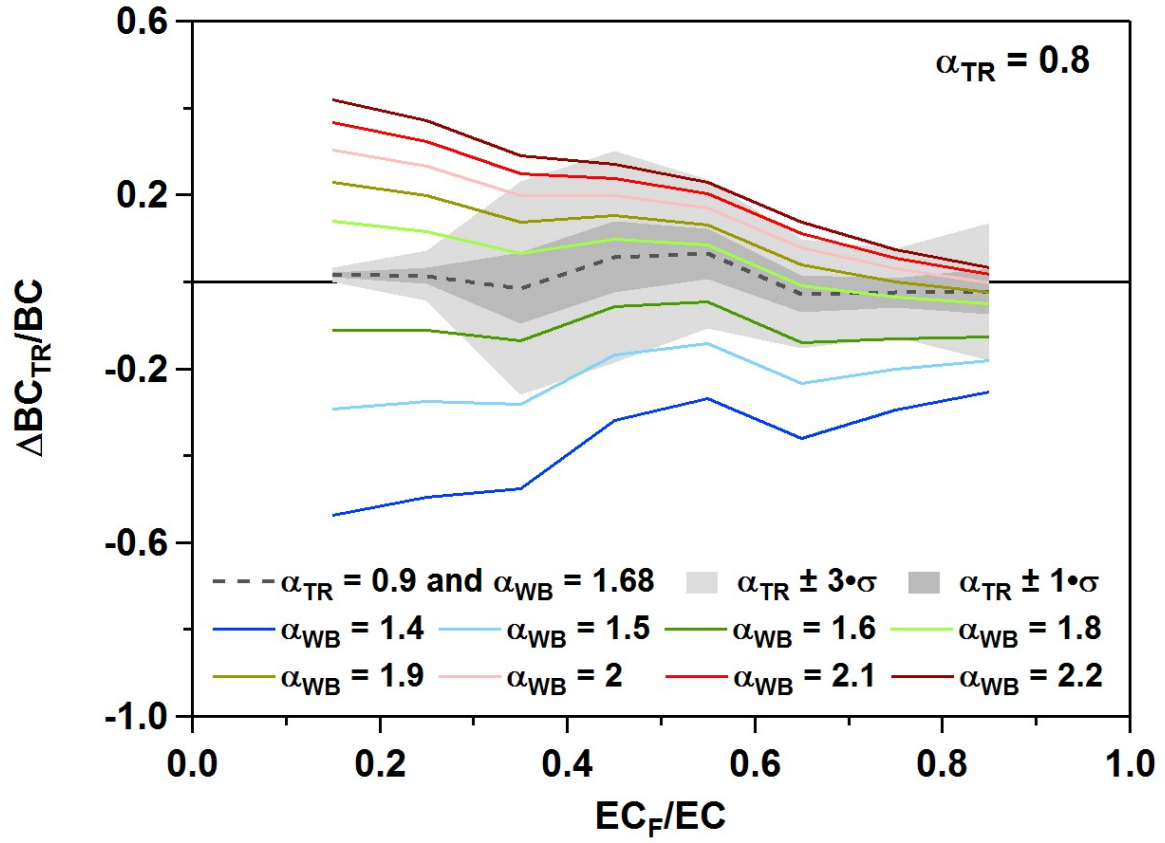

Figure S2: Residuals of  $BC_{TR}/BC$  compared to  $EC_F/EC$  ( $\Delta BC_{TR}/BC$ ) as a function of  $EC_F/EC$  for  $\alpha_{TR} = 0.8$  and  $\alpha_{WB} = 1.4$ - $2.2$  and using the wavelength pair 470 nm and 950 nm. Average  $\Delta BC_{TR}/BC$  values for  $EC_F/EC$  bins of 0.1 are displayed. The dashed grey line denotes the best  $\alpha$  pair ( $\alpha_{TR} = 0.9$  and  $\alpha_{WB} = 1.68$ ) as obtained in Sect. 3.2.1 and the dark and light grey shaded areas mark the  $1\sigma$  (standard deviation) and  $3\sigma$  of  $\Delta BC_{TR}/BC$  per  $EC_F/EC$  bin for this best  $\alpha$  pair.

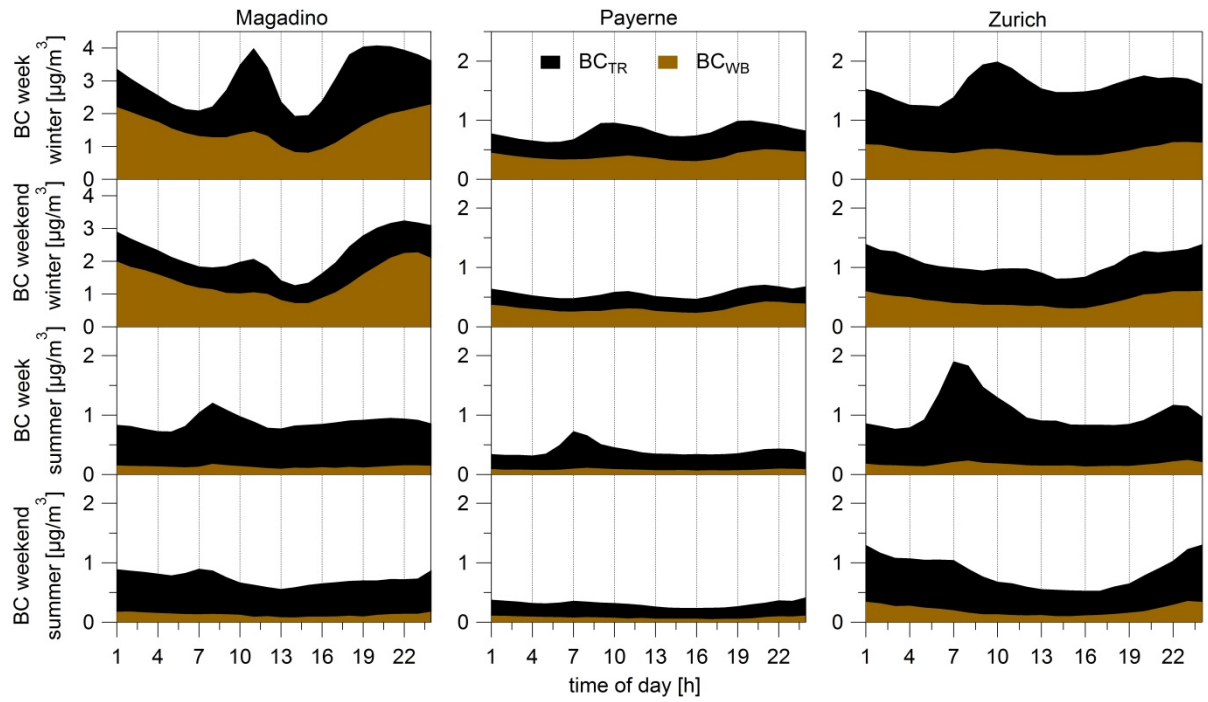

Figure S3: Diurnal cycles of BC for the stations MAG, PAY and ZUR - 1h averages from 2009 to 2012.  $BC_{WB}$  and  $BC_{TR}$  were calculated using the best  $\alpha$  pair ( $\alpha_{TR} = 0.9$  and  $\alpha_{WB} = 1.68$ ) as obtained in Sect. 3.2.1 and using the wavelength pair 470 nm and 950 nm. The split uncertainty between  $BC_{WB}$  and  $BC_{TR}$  ( $\Delta BC_{TR}/BC$ ) is max.  $0.04 \mu\text{g m}^{-3}$ .

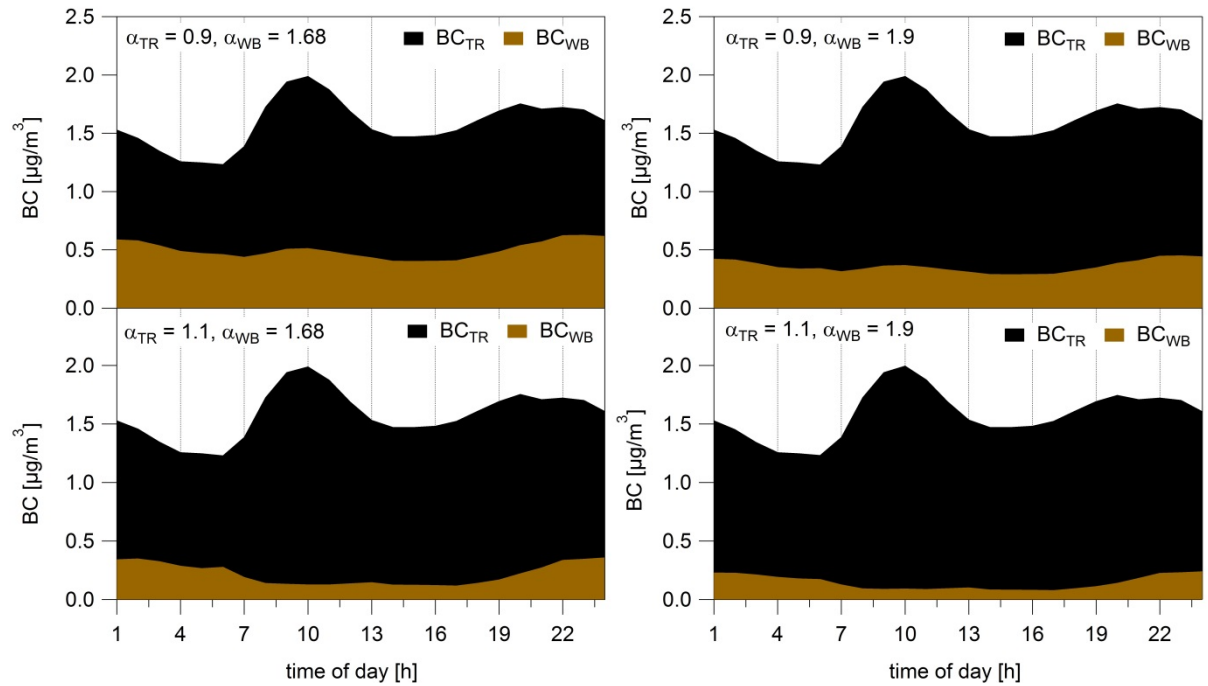

Figure S4: Diurnal cycles of BC for ZUR - 1h averages for winter week days from 2009 to 2012 calculated with different  $\alpha$  combinations and using the wavelength pair 470 nm and 950 nm.
